# Supplementary material for: Multi-shelled LiMn2O4 hollow microspheres as superior cathode materials for lithium-ion batteries
Source: Royal Society of Chemistry journal article supplement (doi:10.1039/c5qi00213c), 2015-12-22
Supplement: c5qi00213c1.pdf [file c5qi00213c1.pdf]

## Multi-shelled $\text{LiMn}_2\text{O}_4$ hollow microspheres as superior cathode materials for Lithium-ion batteries

Feng Wang,<sup>‡a</sup> Jiangyan Wang,<sup>‡b,d</sup> Hao Ren,<sup>a</sup> Hongjie Tang,<sup>b</sup> Ranbo Yu,<sup>\*a</sup> and Dan Wang<sup>\*b,c</sup>

<sup>a</sup>Department of Physical Chemistry, School of Metallurgical and Ecological Engineering, University of Science and Technology Beijing, No. 30, Xueyuan Road, Haidian District, Beijing 100083, P. R. China, Email: ranboyu@ustb.edu.cn

<sup>b</sup>National Key Laboratory of Biochemical Engineering, Institute of Process Engineering, Chinese Academy of Sciences, No. 1 Beiertiao, Zhongguancun, Beijing 100190, P. R. China, Email: danwang@ipe.ac.cn

<sup>c</sup>Centre for Clean Environment and Energy, Gold Coast Campus Griffith University, Queensland 4222, Australia

<sup>d</sup>University of Chinese Academy of Sciences, No.19A Yuquan Road, Beijing 100049, P. R. China

### Supporting information

#### Experimental section:

*Synthesis of multi-shelled  $\text{LiMn}_2\text{O}_4$  hollow spheres:* All reagents were purchased from Beijing Chemical Co., Ltd., and of analytical grade, used without further purification. Lithium acetate ( $\text{LiAc}$ ) and manganese nitrate tetrahydrate ( $\text{Mn}(\text{NO}_3)_2 \cdot 4\text{H}_2\text{O}$ ) were used as metal precursors. Typically, the synthesis process of triple-shelled  $\text{LiMn}_2\text{O}_4$  hollow microspheres was described below as an example. The carbonaceous

microsphere templates were prepared through the emulsion polymerization reaction of sucrose under the hydrothermal conditions as described elsewhere.<sup>[S1]</sup> Freshly-prepared CMSs (0.6 g) were dispersed in 30ml lithium acetate and manganese nitrate solution (the concentration of Li salt and Mn salt was 1 M and 0.1 M, respectively) with the aid of ultrasonication. After ultrasonic dispersion for 10-20 min, the resulting suspension was further aged for 12 h at 30 °C in a water bath, then filtered with a vacuum pump and washed with DI water for three times, and then dried at 80 °C in an oven for 12-24 h. The resultant composite microspheres were heated to 600 °C in air at the rate of 1 °C min<sup>-1</sup>, and kept at 600 °C for 2 h, then cooled down to room temperature naturally. The triple-shelled LiMn<sub>2</sub>O<sub>4</sub> hollow microspheres were collected as black powders. The synthesis processes of quadruple-shelled LiMn<sub>2</sub>O<sub>4</sub> hollow microspheres is very similar to which of the triple-shelled LiMn<sub>2</sub>O<sub>4</sub> hollow microspheres, except the minor differences in aging duration and heating rate (experimental details can be seen in Table S2).

*Materials characterization:* Powder X-ray diffraction (XRD) patterns were carried out through the Panalytical X'Pert PRO MPD [Cu K $\alpha$  radiation ( $\lambda$  = 1.5405 Å)], operating at 40 kV and 30 mA. Scanning electron microscopy (SEM) images were obtained using a JSM-6700 microscope operating at 5.0 kV. Transmission electron microscopy (TEM) images were taken on a FEI Tecnai F20 instrument using an accelerating voltage of 200 kV. The nitrogen adsorption-desorption isotherms under liquid nitrogen (-196 °C) were measured on a Quantochrome Autosorb-1MP sorption analyzer with pre-degassing treatment under vacuum at 200 °C overnight. XPS data

were recorded through an ESCALab220i-XL electron spectrometer from VG Scientific using 300 W Al K $\alpha$  radiation. The binding energies obtained in the XPS analysis were standardized according to C 1s (284.8 eV).

*Electrochemical measurement:* The electrochemical performance of the prepared LiMn<sub>2</sub>O<sub>4</sub> products was carried out using CR2032 coin type cells with Li metal as the counter and reference electrodes at room temperature. The electrolyte was 1 M LiPF<sub>6</sub> in a mixture of ethylene carbonate and diethyl carbonate (50:50 w/w). The working electrode was fabricated by compressing a mixture of the active materials, conductive material (carbon black), and binder (polyvinylidene fluoride, PVDF) in a weight ratio of LiMn<sub>2</sub>O<sub>4</sub>/carbon/PVDF = 7:2:1 onto an aluminum foil current collector. The loading amount of active materials is about 1 mg/cm<sup>2</sup>. The cells were assembled in an argon-filled glove box with the concentrations of moisture and oxygen at below 1 ppm. The electrode capacity was measured by a galvanostatic discharge-charge method between 3.5 and 4.3 V at rates of 1 C, 2 C, 4 C, 8 C or 10 C at a battery test system (Neware BST-5 V 5 mA). CV curves were tested between 3.5-4.3 V (vs. Li<sup>+</sup>/Li) at a constant scan rate of 1 mV/s. Electrochemical impedance spectroscopy (EIS) tests were obtained over the frequency ranging from 1 to 10<sup>5</sup> Hz with an ac amplify voltage of 10 mV.

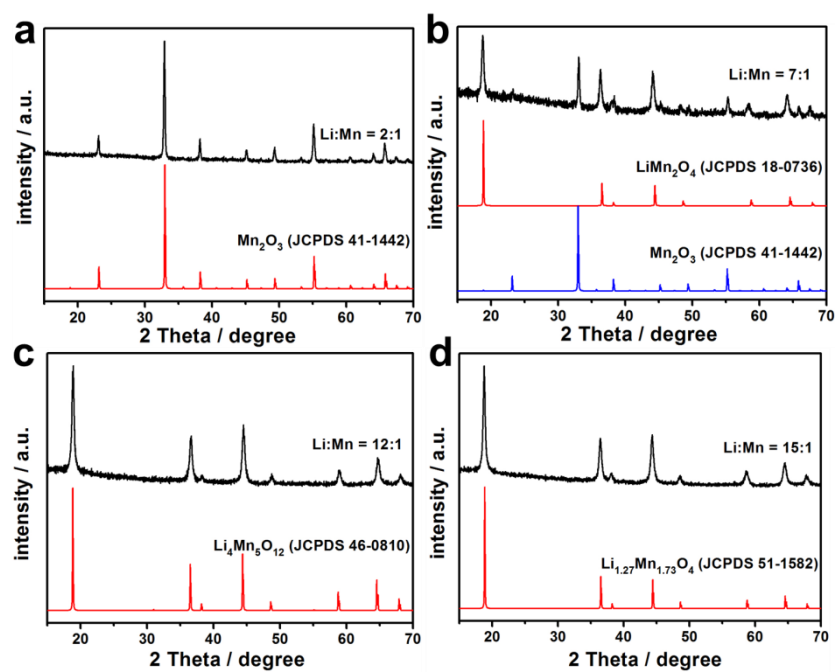

**Figure S1** The effect of adding ratio of Li precursor to Mn precursor on the composition of the products.

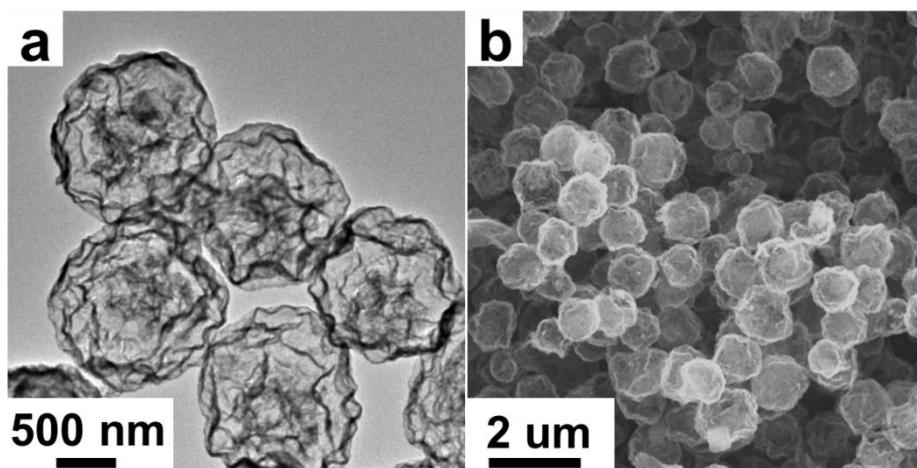

**Figure S2** (a) TEM and (b) SEM images of double-shelled hollow microspheres gotten under a heating rate of 10 °C/min.

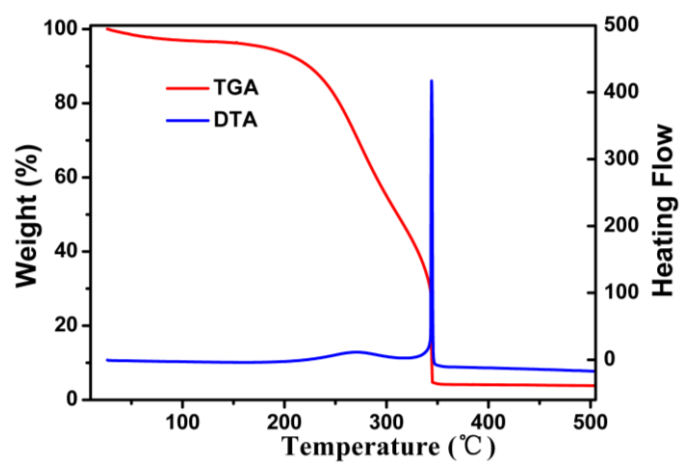

**Figure S3** TGA and DTA curves of carbonaceous microspheres with Li and Mn ions infused under air atmosphere at a heating rate of  $1\text{ }^{\circ}\text{C min}^{-1}$ .

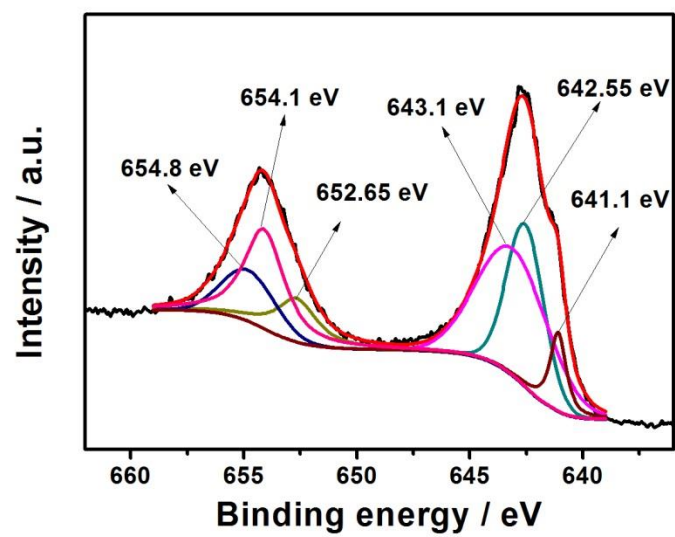

**Figure S4** XPS spectra of Mn 2p of multi-shelled LiMn<sub>2</sub>O<sub>4</sub> hollow microspheres.

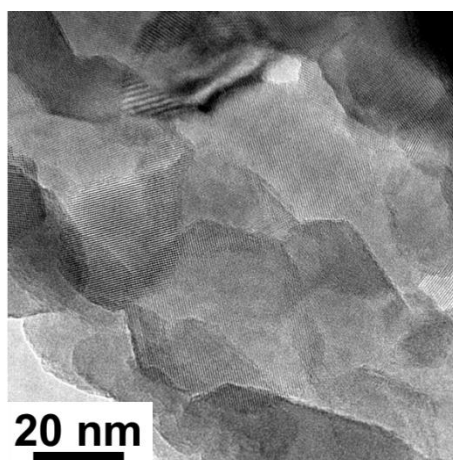

**Figure S5** Enlarged TEM images of the shell on the 3S-LiMn<sub>2</sub>O<sub>4</sub>-HMSs.



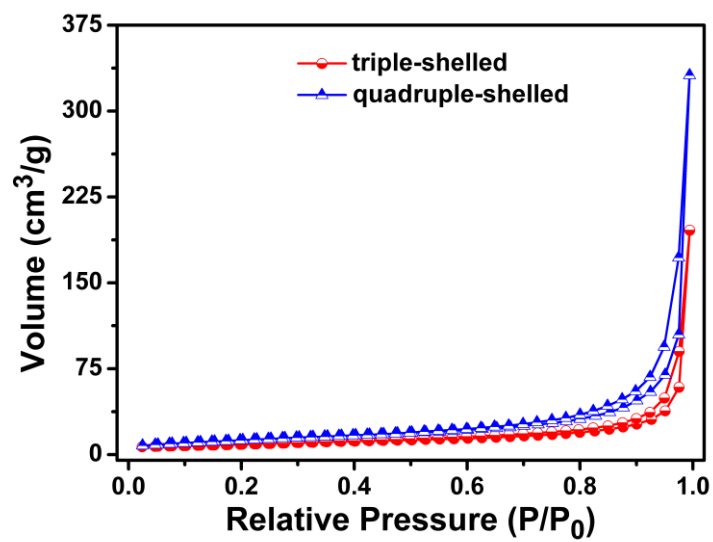

**Figure S6** Nitrogen adsorption–desorption isotherm of multi-shelled  $\text{LiMn}_2\text{O}_4$  hollow microspheres.

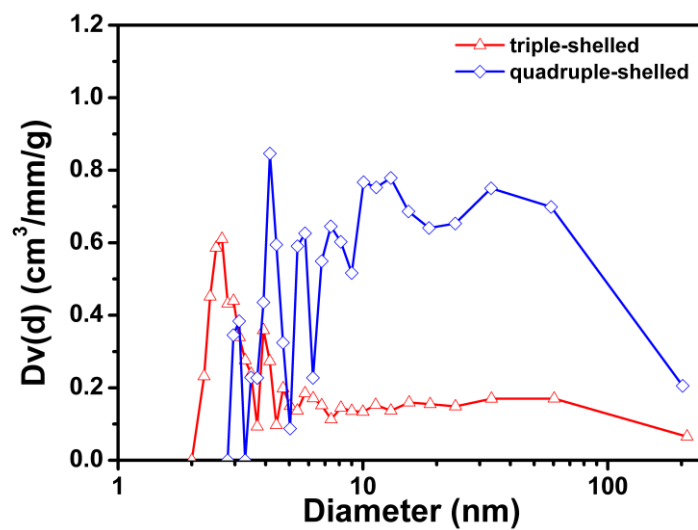

**Figure S7** Barret-Joyner-Halenda (BJH) pore-size distribution curves of multi-shelled  $\text{LiMn}_2\text{O}_4$  hollow microspheres according to the nitrogen adsorption–desorption isotherm.

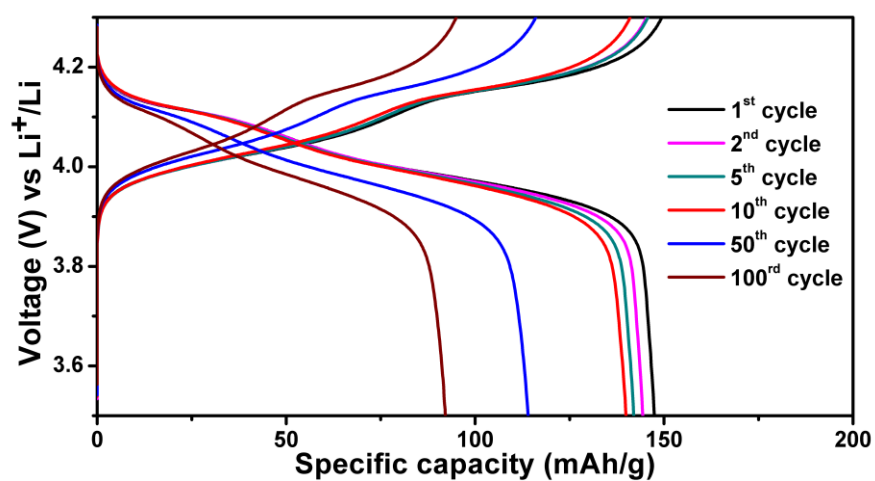

**Figure S8** Discharge-charge curves of the quadruple-shelled hollow microspheres at different cycle numbers with a constant rate of 1 C (assuming 1 C = 148 mA/g).

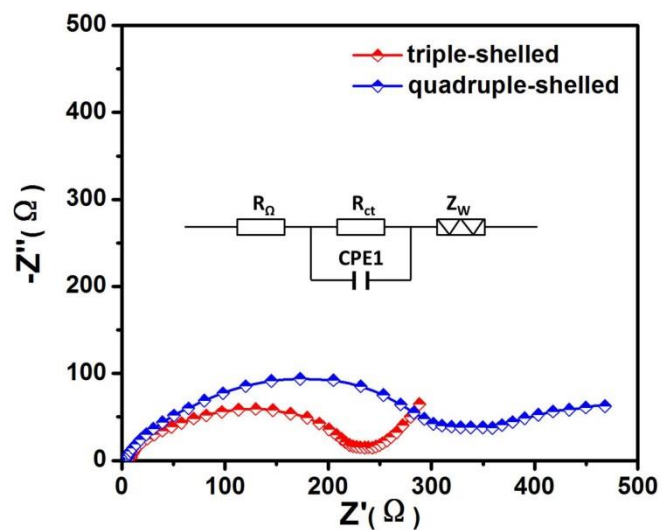

**Figure S9** Electrochemical impedance spectra (EIS) for multi-shelled  $\text{LiMn}_2\text{O}_4$  hollow microspheres after 100 cycles with the simplified Randles equivalent circuit model inset ( $R_\Omega$ , external resistance;  $R_{ct}$ , charge transfer resistance; CPE1, constant phase element;  $Z_W$ , Warburg impedance).

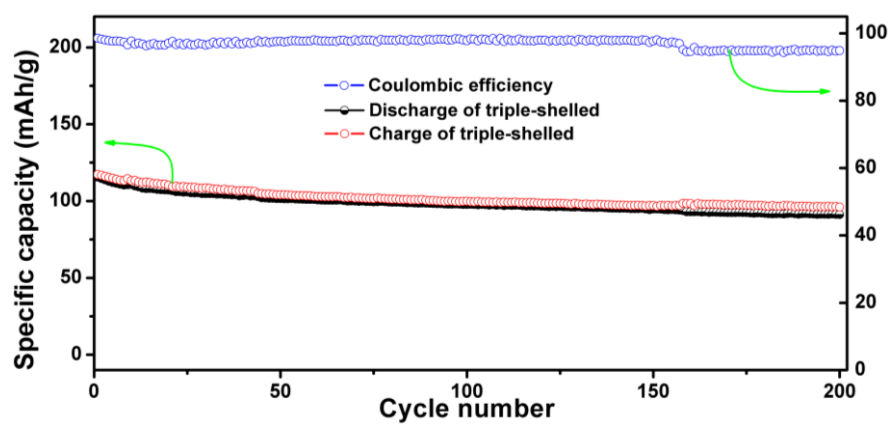

**Figure S10** Long-term cycling performance and Coulombic efficiency for triple-shelled  $\text{LiMn}_2\text{O}_4$  hollow microspheres at a rate of 1 C between 3.5 and 4.3 V.

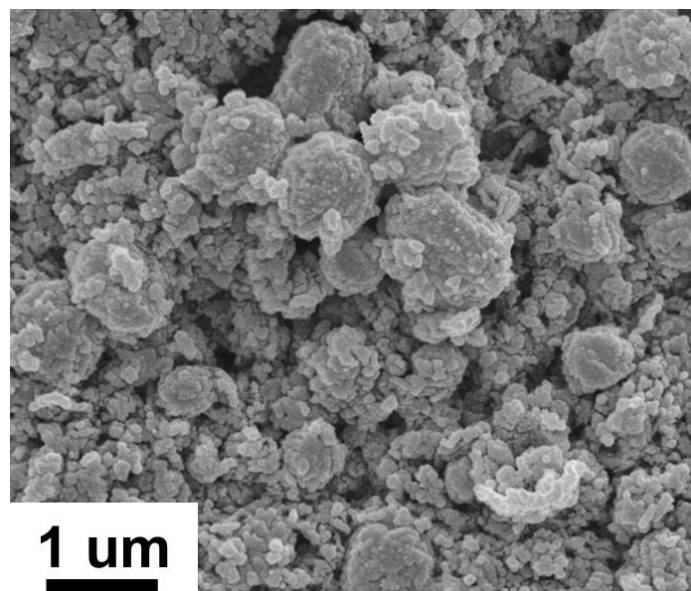

**Figure S11** SEM images of the triple-shelled  $\text{LiMn}_2\text{O}_4$  hollow microspheres after 100 cycles.

**Table S1** Comparison of the electrochemical performance of LiMn<sub>2</sub>O<sub>4</sub>-based electrode materials in literatures.

| LiMn <sub>2</sub> O <sub>4</sub> materials     | Initial discharge capacity (mAh/g) / current density (mA/g) | Capacity fading rate / current density (mA/g) / cycle number | References |
|------------------------------------------------|-------------------------------------------------------------|--------------------------------------------------------------|------------|
| LiMn <sub>2</sub> O <sub>4</sub> nanoparticles | 110.9 / 148                                                 | 0.18% / 148 / 100                                            | S2         |
| LiMn <sub>2</sub> O <sub>4</sub> powder        | 130 / 148                                                   | 0.15% / 148 / 50                                             | S3         |
| LiMn <sub>2</sub> O <sub>4</sub> powder        | 80.9 / 148                                                  |                                                              | S4         |
| LiMn <sub>2</sub> O <sub>4</sub> particles     | 120.4 / 148                                                 | 0.19% / 148 / 100                                            | S5         |
| LiMn <sub>2</sub> O <sub>4</sub> particles     | 114.0 / 148                                                 | 0.12% / 148 / 100                                            | S6         |
| LiMn <sub>2</sub> O <sub>4</sub> nanowires     | 115 / 148                                                   | 0.15% / 148 / 100                                            | S7         |
| LiMn <sub>2</sub> O <sub>4</sub> particles     | 124 / 120                                                   | 0.18% / 120 / 50                                             | S8         |
| LiMn <sub>2</sub> O <sub>4</sub> /C nanowires  | 115 / 140                                                   | 0.87% / 140 / 300                                            | S9         |
| GR/LiMn <sub>2</sub> O <sub>4</sub> particles  | 140 / 140                                                   | 0.1% / 140 / 50                                              | S10        |
| 3S-LiMn <sub>2</sub> O <sub>4</sub> -HMSs      | 115.6 / 148                                                 | 0.10% / 148 / 200                                            | This work  |

**Table S2** Summary of synthesis conditions of various multi-shelled  $\text{LiMn}_2\text{O}_4$  hollow microspheres.

| Structures        | Ratio of Li to Mn | Solvent          | Adsorption temperature ( °C) | Adsorption duration (h) | Calcination temperature ( °C) | Heating rate ( °C /min) |
|-------------------|-------------------|------------------|------------------------------|-------------------------|-------------------------------|-------------------------|
| Triple-shelled    | 10:1              | H <sub>2</sub> O | 30                           | 12                      | 600                           | 1                       |
| Quadruple-shelled | 10:1              | H <sub>2</sub> O | 30                           | 24                      | 600                           | 0.5                     |



**Table S3** Summary of parameters of the  $\text{LiMn}_2\text{O}_4$  products according to the nitrogen adsorption–desorption isotherm.

| Structures        | Specific surface area ( $\text{m}^2/\text{g}$ ) | Pore volume ( $\text{cm}^3/\text{g}$ ) |
|-------------------|-------------------------------------------------|----------------------------------------|
| Triple-shelled    | 31.69                                           | 0.304                                  |
| Quadruple-shelled | 47.04                                           | 0.513                                  |

## References

- [S1] X. Y. Lai, J. Li, B. A. Korgel, Z. H. Dong, Z. M. Li, F. B. Su, J. Du and D. Wang, *Angew. Chem. Int. Ed.*, 2011, **50**, 2738–2741.
- [S2] S. Karaal, H. Kose, A. O. Aydin and H. Akbulut, *Mat. Sci. Semicond. Process.*, 2015, **38**, 397-403.
- [S3] B. Hamankiewicz, M. Michalska, M. Krajewski, D. Ziolkowska, L. Lipinska, K. Korona, M. Kaminska and A. Czerwinski, *Solid State Ionics*, 2014, **262**, 9-13.
- [S4] T. Y. S. P. Putra, M. Yonemura, S. Torii, T. Ishigaki and T. Kamiyama, *Solid State Ionics*, 2014, **262**, 83-87.
- [S5] X. He, J. Wang, H. P. Jia, R. Kloepsch, H. D. Liu, K. Beltrop. and J. Li, *J. Power Sources*, 2015, **293**, 306-311.
- [S6] Q. T. Zhang, J. T. Mei, X. M. Wang, W. F. Fan, F. C. Wang, W. J. Lu and F. L. Tang, *J. Alloys Compd.*, 2014, **606**, 249-253.
- [S7] D. Y. Kim, P. Muralidharan, H.-W. Lee, R. Ruffo, Y. Yang, C. K. Chan, H. L. Peng, R. A. Huggins and Y. Cui, *Nano Lett.*, 2008, **8**, 3948-3952.
- [S8] X. Zhao, M. V. Reddy, H. X. Liu, S. Ramakrishna, G. V. S. Rao and B. V. R. Chowdari, *RSC Advances*, 2012, **2**, 7462–7469.
- [S9] W. W. Sun, H. Q. Liu, Y. M. Liu, G. X. Bai, W. Liu, S. S. Guo and X.-Z. Zhao, *Nanoscale*, 2015, **7**, 13173-13180.
- [S10] M. H. Pyun and Y. J. Park, *J. Alloys Compd.*, 2015, **643**, S90-S94.
